# Supplementary material for: Particle Size Distribution and Feed Sorting of Hay-Based and Silage-Based Total Mixed Ration of Calabrian Dairy Herds
Source: MDPI journal article supplement (doi:10.3390/dairy5010009), 2024-01-15
Supplement: s1 [file s1]

**The main ingredients of each diet for cows High Production.**

| Dairy farm Code                           | 1         | 2         | 3         | 4         | 5         | 6         | 7         | 8         | 9         | 10        | 11        | 12        | 13        |
|-------------------------------------------|-----------|-----------|-----------|-----------|-----------|-----------|-----------|-----------|-----------|-----------|-----------|-----------|-----------|
| TMR type                                  | TMR<br>-S | TMR<br>-H | TMR<br>-S | TMR<br>-S | TMR<br>-H | TMR<br>-S | TMR<br>-H | TMR<br>-H | TMR<br>-S | TMR<br>-H | TMR<br>-H | TMR<br>-H | TMR<br>-H |
| Ingredients (kg /cow)                     |           |           |           |           |           |           |           |           |           |           |           |           |           |
| Maize silage                              | 20        |           |           | 18        | 10        |           |           |           | 20        |           |           | 11        | 11.5      |
| Winter cereal silages                     |           |           | 25        |           |           | 25        |           |           |           | 12        |           |           |           |
| Dehydrated alfalfa                        | 2.6       |           |           |           |           |           |           |           |           |           |           |           |           |
| Italian ryegrass hay                      |           |           |           | 2.2       |           |           |           |           |           |           |           | 3         |           |
| Oat-ryegrass hay                          |           |           | 4         |           |           |           | 12.5      |           |           |           |           |           |           |
| Oat-vetch-ryegrass hay                    | 1.1       | 4.5       |           |           | 5         | 1.1       |           |           |           | 4.5       | 6         |           | 7.5       |
| Oat hay                                   |           | 4.5       |           |           |           |           |           | 11        |           |           |           |           |           |
| Oat-vetch hay                             |           |           |           |           |           |           |           |           | 6         |           |           |           |           |
| Alfalfa hay                               |           | 3         |           | 3.5       | 1.7       | 3         |           | 2.5       |           | 2         | 4         | 4         | 3         |
| Sulla ( <i>Hedysarum coronarium</i> ) hay |           |           |           |           | 1         |           |           |           |           |           |           |           |           |
| Local polyphytic hay                      |           |           |           |           |           |           |           |           |           |           |           | 2         |           |
| Concentrate, meal                         | 4         | 10.5      | 9.6       | 12.8      | 13        | 6.7       | 11        | 11        | 12        | 6.3       | 6         | 11.7      | 10        |
| Maize, meal                               | 6.6       |           |           |           |           | 5.7       |           |           |           | 6.4       | 6.5       |           |           |
| Maize, steam-flaked                       |           | 1         |           |           |           | 1         |           |           |           |           |           |           |           |
| Soybean meal                              | 3.2       |           |           |           |           |           |           |           |           |           |           |           |           |
| Hydrogenated fat                          | 0.66      |           | 0.4       |           |           | 0.5       |           |           |           | 0.35      | 0.1       |           |           |
| Molasses, beet                            |           | 1         |           |           |           |           |           |           |           |           |           |           |           |
| Citrus pulp                               |           |           |           |           |           |           |           |           |           | 3         |           | 2.5       |           |
| Wheat bran                                |           |           |           |           |           |           |           |           |           |           | 1         |           |           |
| Water                                     | 2         | 7.5       | 0         | 5         | 6.5       | 4         | 12        | 5         | 0         | 5.5       | 10        | 9.5       | 8         |
